# Supplementary material for: High SOX9 Maintains Glioma Stem Cell Activity through a Regulatory Loop Involving STAT3 and PML
Source: MDPI journal article supplement (doi:10.3390/ijms23094511), 2022-04-19
Supplement: s1 [file s1]

**A**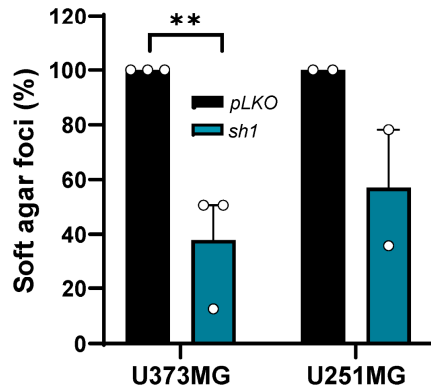**B**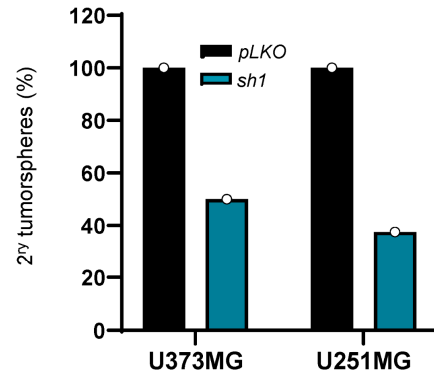

**Figure S1.** SOX9 knock-down impairs tumorigenicity. (A) Quantification of number of foci formed in soft agar from glioma cell lines infected with pLKO or sh1 plasmids (n=2). (B) Quantification of secondary tumorspheres after 10 days in culture post disaggregation of primary tumorspheres.

**Supplemental Table S1.** List of genes differentially expressed between *pLKO* and *shSOX9* GNS166 cells.

| ID           | control Avg (log2) | shRNA Avg (log2) | Fold change | P-val    | FDR P-val | Gene Symbol  | Description                                                     |
|--------------|--------------------|------------------|-------------|----------|-----------|--------------|-----------------------------------------------------------------|
| 202936_s_at  | 10.28              | 8.68             | 3.03        | 3.88E-07 | 0.0212    | SOX9         | SRY box 9                                                       |
| 1555564_a_at | 7.52               | 6.13             | 2.62        | 1.48E-06 | 0.0405    | CFI          | complement factor I                                             |
| 202935_s_at  | 9.82               | 8.79             | 2.05        | 4.67E-06 | 0.0474    | SOX9         | SRY box 9                                                       |
| 225328_at    | 11.39              | 10.35            | 2.06        | 6.41E-06 | 0.0474    | FBXO32       | F-box protein 32                                                |
| 205698_s_at  | 8.48               | 7.3              | 2.27        | 6.61E-06 | 0.0474    | MAP2K6       | mitogen-activated protein kinase kinase 6                       |
| 202206_at    | 10.55              | 9.33             | 2.32        | 7.46E-06 | 0.0474    | ARL4C        | ADP-ribosylation factor like GTPase 4C                          |
| 207010_at    | 4.92               | 6.28             | -2.57       | 1.18E-05 | 0.0474    | GABRB1       | gamma-aminobutyric acid (GABA) A receptor, beta 1               |
| 232195_at    | 7.01               | 8.17             | -2.23       | 1.23E-05 | 0.0474    | GPR158       | G protein-coupled receptor 158                                  |
| 203854_at    | 9.49               | 8.44             | 2.08        | 1.49E-05 | 0.0480    | CFI          | complement factor I                                             |
| 1570469_at   | 7.33               | 6.19             | 2.21        | 1.68E-05 | 0.0510    |              |                                                                 |
| 219857_at    | 6.83               | 5.77             | 2.09        | 2.50E-05 | 0.0538    | PLEKHS1      | pleckstrin homology domain containing, family S member 1        |
| 203963_at    | 9.25               | 8.23             | 2.03        | 2.56E-05 | 0.0538    | CA12         | carbonic anhydrase XII                                          |
| 228501_at    | 7.52               | 6.35             | 2.24        | 2.79E-05 | 0.0538    | GALNT15      | polypeptide N-acetylgalactosaminyltransferase 15                |
| 242979_at    | 6.8                | 5.76             | 2.05        | 3.15E-05 | 0.0538    | IRS1         | insulin receptor substrate 1                                    |
| 228245_s_at  | 7.91               | 8.92             | -2.02       | 3.30E-05 | 0.0546    | LOC728715    | ovostatin homolog 2                                             |
| 235276_at    | 9.02               | 7.81             | 2.32        | 3.45E-05 | 0.0555    | EPSTI1       | epithelial stromal interaction 1 (breast)                       |
| 209309_at    | 4.75               | 5.92             | -2.25       | 3.63E-05 | 0.0566    | AZGP1        | alpha-2-glycoprotein 1, zinc-binding                            |
| 229947_at    | 10.17              | 8.83             | 2.52        | 4.00E-05 | 0.0575    | PI15         | peptidase inhibitor 15                                          |
| 213201_s_at  | 6.92               | 7.93             | -2.01       | 5.27E-05 | 0.0599    | TNNT1        | troponin T type 1 (skeletal, slow)                              |
| 212985_at    | 9.64               | 8.59             | 2.08        | 5.57E-05 | 0.0603    | APBB2        | amyloid beta (A4) precursor protein-binding, family B, member 2 |
| 1552754_a_at | 5.89               | 7.18             | -2.44       | 6.68E-05 | 0.0617    | CADM2        | cell adhesion molecule 2                                        |
| 218152_at    | 9.28               | 8.14             | 2.21        | 7.78E-05 | 0.0624    | HMG20A       | high mobility group 20A                                         |
| 210794_s_at  | 8.92               | 9.98             | -2.09       | 8.13E-05 | 0.0625    | MEG3         | maternally expressed 3 (non-protein coding)                     |
| 1569727_at   | 5.2                | 6.37             | -2.25       | 9.67E-05 | 0.0660    | LOC101927701 | uncharacterized LOC101927701                                    |
| 209493_at    | 8.82               | 7.8              | 2.02        | 9.94E-05 | 0.0660    | PDZD2        | PDZ domain containing 2                                         |
| 222986_s_at  | 11.16              | 10.11            | 2.06        | 0.0001   | 0.0660    | SHISA5       | shisa family member 5                                           |

|             |       |       |       |        |        |                   |                                                             |
|-------------|-------|-------|-------|--------|--------|-------------------|-------------------------------------------------------------|
| 201601_x_at | 13.46 | 11.53 | 3.81  | 0.0001 | 0.0660 | IFITM1,<br>IFITM2 | interferon induced transmembrane protein 1 and 2            |
| 227439_at   | 7.1   | 9.01  | -3.75 | 0.0001 | 0.0660 | ANKS1B            | ankyrin repeat and sterile alpha motif domain containing 1B |
| 237105_at   | 6.33  | 5.14  | 2.28  | 0.0001 | 0.0660 | LOC101927027      | uncharacterized LOC101927027                                |
| 235118_at   | 4.16  | 5.56  | -2.64 | 0.0001 | 0.0660 | CADM2             | cell adhesion molecule 2                                    |
| 228873_at   | 8.1   | 9.12  | -2.04 | 0.0001 | 0.0686 | COL22A1           | collagen, type XXII, alpha 1                                |
| 205625_s_at | 8.72  | 9.9   | -2.27 | 0.0002 | 0.0721 | CALB1             | calbindin 1                                                 |
| 225345_s_at | 8.5   | 7.31  | 2.28  | 0.0002 | 0.0724 | FBXO32            | F-box protein 32                                            |
| 228439_at   | 7.85  | 6.64  | 2.33  | 0.0002 | 0.0728 | BATF2             | basic leucine zipper transcription factor, ATF-like 2       |
| 206683_at   | 6.27  | 7.41  | -2.21 | 0.0002 | 0.0771 | ZNF165            | zinc finger protein 165                                     |
| 202411_at   | 11.56 | 10.43 | 2.18  | 0.0002 | 0.0790 | IFI27             | interferon, alpha-inducible protein 27                      |
| 229927_at   | 8.78  | 7.44  | 2.55  | 0.0002 | 0.0790 | LEMD1             | LEM domain containing 1                                     |
| 213241_at   | 8.31  | 7.1   | 2.31  | 0.0002 | 0.0790 | PLXNC1            | plexin C1                                                   |
| 228367_at   | 9.02  | 7.94  | 2.13  | 0.0003 | 0.0793 | ALPK2             | alpha kinase 2                                              |
| 213421_x_at | 6.81  | 8.35  | -2.91 | 0.0003 | 0.0848 | PRSS3             | protease, serine, 3                                         |
| 1555464_at  | 5.71  | 4.34  | 2.58  | 0.0003 | 0.0849 | IFIH1             | interferon induced, with helicase C domain 1                |
| 202508_s_at | 7.25  | 8.26  | -2.01 | 0.0004 | 0.0912 | SNAP25            | synaptosome associated protein 25kDa                        |
| 200629_at   | 12.03 | 10.82 | 2.32  | 0.0004 | 0.0920 | WARS              | tryptophanyl-tRNA synthetase                                |
| 201641_at   | 8.8   | 7.76  | 2.06  | 0.0004 | 0.0934 | BST2              | bone marrow stromal cell antigen 2                          |
| 211478_s_at | 4.93  | 6.02  | -2.13 | 0.0004 | 0.0934 | DPP4              | dipeptidyl-peptidase 4                                      |
| 204994_at   | 10.15 | 8.68  | 2.77  | 0.0004 | 0.0934 | MX2               | MX dynamin-like GTPase 2                                    |
| 205623_at   | 10.1  | 9.01  | 2.12  | 0.0004 | 0.0962 | ALDH3A1           | aldehyde dehydrogenase 3 family, member A1                  |
| 214022_s_at | 13.17 | 11.54 | 3.09  | 0.0005 | 0.0965 | IFITM1            | interferon induced transmembrane protein 1                  |
| 232355_at   | 6.71  | 7.73  | -2.04 | 0.0005 | 0.0965 | SNORD114-3        | small nucleolar RNA, C/D box 114-3                          |
| 209417_s_at | 11.15 | 10.01 | 2.21  | 0.0005 | 0.0965 | IFI35             | interferon-induced protein 35                               |
| 204972_at   | 9.66  | 8.49  | 2.26  | 0.0005 | 0.0990 | OAS2              | 2'-5'-oligoadenylate synthetase 2                           |
| 203717_at   | 7.15  | 8.22  | -2.1  | 0.0005 | 0.1008 | DPP4              | dipeptidyl-peptidase 4                                      |
| 222793_at   | 9.73  | 8.24  | 2.81  | 0.0006 | 0.1045 | DDX58             | DEAD (Asp-Glu-Ala-Asp) box polypeptide 58                   |
| 207463_x_at | 6.64  | 8.04  | -2.64 | 0.0006 | 0.1068 | PRSS3             | protease, serine, 3                                         |
| 226459_at   | 9.9   | 8.02  | 3.69  | 0.0006 | 0.1068 | PIK3AP1           | phosphoinositide-3-kinase adaptor protein 1                 |
| 202687_s_at | 9.67  | 8.43  | 2.36  | 0.0006 | 0.1068 | TNFSF10           | tumor necrosis factor (ligand) superfamily, member 10       |
| 204439_at   | 12.36 | 11.09 | 2.41  | 0.0008 | 0.1113 | IFI44L            | interferon-induced protein 44-like                          |
| 218943_s_at | 9.7   | 8.24  | 2.75  | 0.0008 | 0.1113 | DDX58             | DEAD (Asp-Glu-Ala-Asp) box polypeptide 58                   |
| 200628_s_at | 10.28 | 9.11  | 2.24  | 0.0008 | 0.1144 | WARS              | tryptophanyl-tRNA synthetase                                |
| 205660_at   | 10.06 | 8.59  | 2.78  | 0.0009 | 0.1196 | OASL              | 2'-5'-oligoadenylate synthetase-like                        |
| 227441_s_at | 3.39  | 4.52  | -2.18 | 0.0010 | 0.1212 | ANKS1B            | ankyrin repeat and sterile alpha motif domain containing 1B |
| 210797_s_at | 9.65  | 8.26  | 2.63  | 0.0010 | 0.1221 | OASL              | 2'-5'-oligoadenylate synthetase-like                        |
| 227440_at   | 5.22  | 6.37  | -2.22 | 0.0012 | 0.1324 | ANKS1B            | ankyrin repeat and sterile alpha motif domain containing 1B |
| 240292_x_at | 3.37  | 4.82  | -2.75 | 0.0014 | 0.1423 | ANKS1B            | ankyrin repeat and sterile alpha motif domain containing 1B |
| 235489_at   | 7.1   | 6.1   | 2     | 0.0015 | 0.1438 | RHOJ              | ras homolog family member J                                 |
| 202269_x_at | 10.62 | 9.52  | 2.14  | 0.0016 | 0.1471 | GBP1              | guanylate binding protein 1, interferon-inducible           |
| 202688_at   | 9.58  | 8.47  | 2.16  | 0.0016 | 0.1474 | TNFSF10           | tumor necrosis factor (ligand) superfamily, member 10       |
| 205552_s_at | 10.14 | 9.09  | 2.07  | 0.0018 | 0.1549 | OAS1              | 2'-5'-oligoadenylate synthetase 1                           |
| 204187_at   | 9.51  | 8.42  | 2.12  | 0.0019 | 0.1558 | GMPR              | guanosine monophosphate reductase                           |
| 213797_at   | 9.9   | 8.35  | 2.93  | 0.0019 | 0.1558 | RSAD2             | radical S-adenosyl methionine domain containing 2           |

|              |       |       |       |        |        |          |                                                                |
|--------------|-------|-------|-------|--------|--------|----------|----------------------------------------------------------------|
| 242625_at    | 10.37 | 8.87  | 2.83  | 0.0019 | 0.1576 | RSAD2    | radical S-adenosyl methionine domain containing 2              |
| 204533_at    | 9.25  | 7.15  | 4.3   | 0.0021 | 0.1629 | CXCL10   | chemokine (C-X-C motif) ligand 10                              |
| 228152_s_at  | 10.88 | 9.57  | 2.48  | 0.0021 | 0.1631 | DDX60L   | DEAD (Asp-Glu-Ala-Asp) box polypeptide 60-like                 |
| 205699_at    | 6.58  | 5.49  | 2.12  | 0.0022 | 0.1654 | MAP2K6   | mitogen-activated protein kinase kinase 6                      |
| 230865_at    | 6.62  | 5.34  | 2.43  | 0.0022 | 0.1654 | LIX1     | limb and CNS expressed 1                                       |
| 210163_at    | 6.54  | 5.32  | 2.33  | 0.0022 | 0.1655 | CXCL11   | chemokine (C-X-C motif) ligand 11                              |
| 223502_s_at  | 9.25  | 7.23  | 4.04  | 0.0022 | 0.1657 | TNFSF13B | tumor necrosis factor (ligand) superfamily, member 13b         |
| 229764_at    | 7.78  | 6.61  | 2.26  | 0.0024 | 0.1680 | TPRG1    | tumor protein p63 regulated 1                                  |
| 208025_s_at  | 5.99  | 7.12  | -2.18 | 0.0026 | 0.1748 | HMGA2    | high mobility group AT-hook 2                                  |
| 1558945_s_at | 4     | 5.19  | -2.27 | 0.0027 | 0.1778 | CACNA1A  | calcium channel, voltage-dependent, P/Q type, alpha 1A subunit |
| 231577_s_at  | 10.92 | 9.81  | 2.16  | 0.0028 | 0.1794 | GBP1     | guanylate binding protein 1, interferon-inducible              |
| 241014_at    | 9.14  | 8.1   | 2.06  | 0.0028 | 0.1794 | FLG-AS1  | FLG antisense RNA 1                                            |
| 202311_s_at  | 7.77  | 6.64  | 2.19  | 0.0028 | 0.1794 | COL1A1   | collagen, type I, alpha 1                                      |
| 228329_at    | 6.13  | 7.19  | -2.08 | 0.0028 | 0.1794 | DAB1     | Dab, reelin signal transducer, homolog 1 (Drosophila)          |
| 205498_at    | 4.67  | 5.69  | -2.02 | 0.0030 | 0.1839 | GHR      | growth hormone receptor                                        |
| 223501_at    | 8.92  | 6.95  | 3.93  | 0.0043 | 0.2037 | TNFSF13B | tumor necrosis factor (ligand) superfamily, member 13b         |
| 230650_at    | 6.35  | 7.57  | -2.33 | 0.0043 | 0.2043 | SLCO5A1  | solute carrier organic anion transporter family, member 5A1    |
| 226702_at    | 11.31 | 10.17 | 2.21  | 0.0046 | 0.2099 | CMPK2    | cytidine monophosphate (UMP-CMP) kinase 2, mitochondrial       |
| 211122_s_at  | 7.51  | 6.32  | 2.29  | 0.0047 | 0.2113 | CXCL11   | chemokine (C-X-C motif) ligand 11                              |
| 230383_x_at  | 7.73  | 6.67  | 2.09  | 0.0050 | 0.2189 | SLFN5    | schlafen family member 5                                       |
| 223614_at    | 7.44  | 8.52  | -2.11 | 0.0050 | 0.2189 | MMP16    | matrix metalloproteinase 16 (membrane-inserted)                |
| 222802_at    | 8.58  | 7.57  | 2.02  | 0.0069 | 0.2461 | EDN1     | endothelin 1                                                   |
| 242961_x_at  | 9.69  | 8.54  | 2.23  | 0.0117 | 0.3033 | DDX58    | DEAD (Asp-Glu-Ala-Asp) box polypeptide 58                      |
| 210785_s_at  | 8.88  | 7.86  | 2.03  | 0.0378 | 0.4571 | THEMIS2  | thymocyte selection associated family member 2                 |
